# Supplementary material for: Modulation of the Epithelial-Immune Cell Crosstalk and Related Galectin Secretion by DP3-5 Galacto-Oligosaccharides and β-3′Galactosyllactose
Source: MDPI journal article supplement (doi:10.3390/biom12030384), 2022-02-28
Supplement: s1 [file s1]

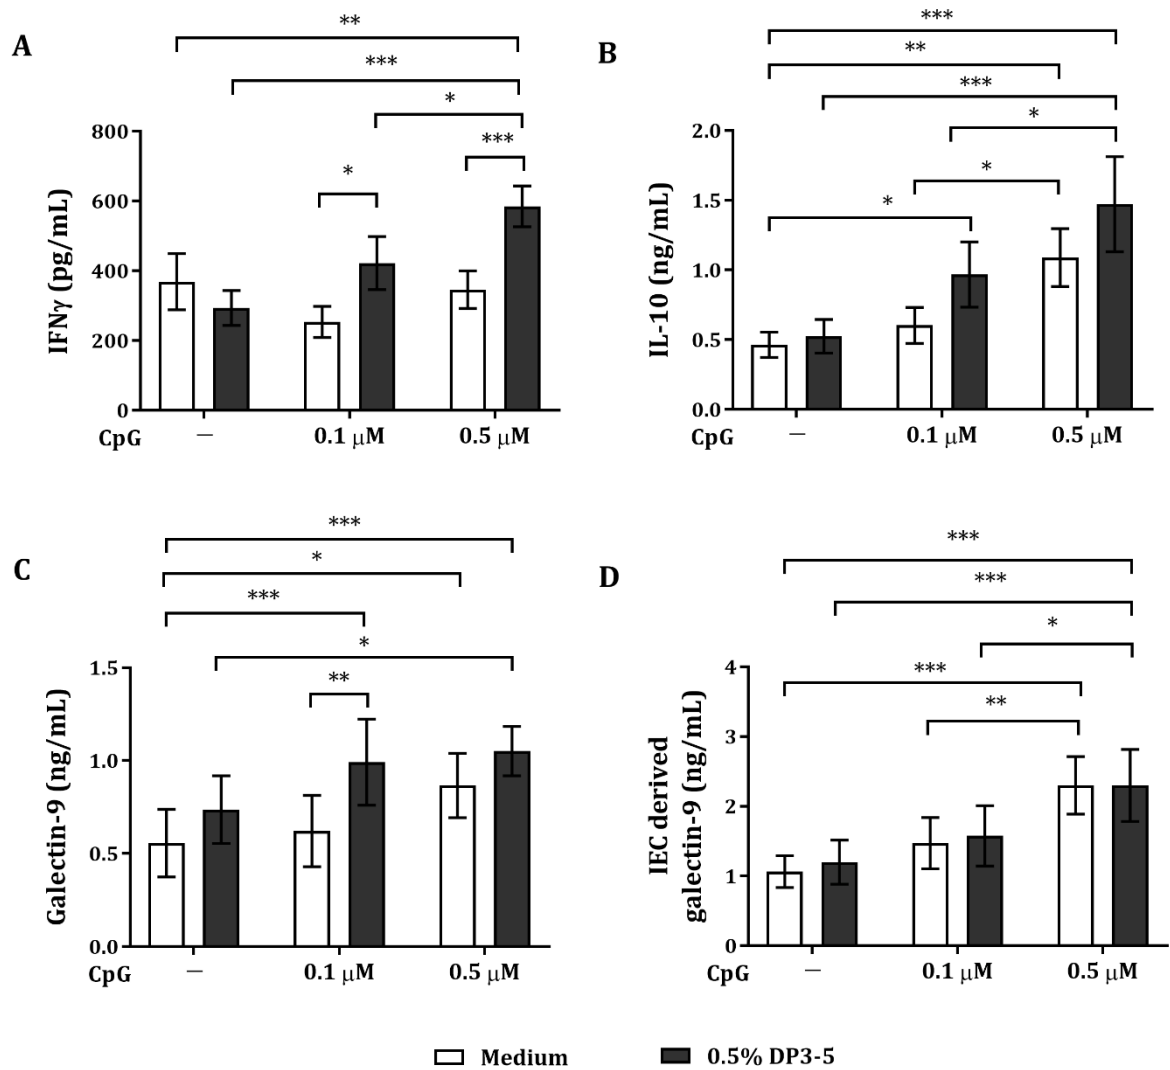

**Figure S1. Lower CpG concentrations effectively supported immunomodulatory effects by GOS DP3-5.** IEC were apically exposed to 0.5% GOS DP3-5 (*w/v*) in combination with 0.1 or 0.5  $\mu$ M CpG and basolaterally to  $\alpha$ CD3/CD28-activated PBMC. After 24 hours incubation, IFN $\gamma$  (A), IL-10 (B) and galectin-9 (C) were measured in the basolateral supernatant. After IEC/PBMC co-culture, IEC were washed and incubated in fresh medium for additional 24 hours after which IEC-derived galectin-9 (D) was measured. Data represent mean  $\pm$  SEM of  $n = 6$  independent PBMC donors ( $n = 5$  for IFN $\gamma$ ) (\*  $p < 0.05$ , \*\*  $p < 0.01$ , \*\*\*  $p < 0.001$ ).

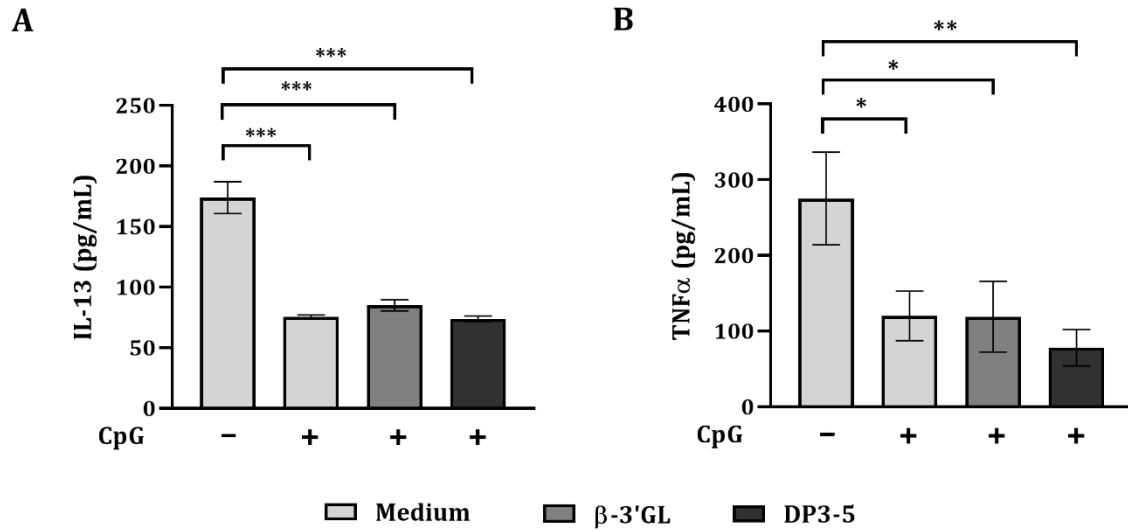

|       | IEC-derived<br>galectin-3 | IEC-derived<br>galectin-4 | IEC-derived<br>galectin-9 |
|-------|---------------------------|---------------------------|---------------------------|
| TNFα  | n.s.                      | n.s.                      | n.s.                      |
|       | r = 0.32                  | r = 0.32                  | r = -0.009                |
|       | p = 0.06                  | p = 0.06                  | p = 0.96                  |
| IL-13 | -                         | n.s.                      | -                         |
|       | r = -0.42                 | r = -0.34                 | r = -0.54                 |
|       | p = 0.04                  | p = 0.1                   | p = 0.007                 |

- Negative correlation; n.s. non-significant correlation

**Figure S2. Cytokine secretion in IEC/PBMC co-culture model.** IEC were apically exposed to GOS DP3-5 or β-3'GL (0.5% *w/v*) in combination with 0.1 μM CpG, and basolaterally to αCD3/CD28-activated PBMC. After 24 hours incubation, TNFα (A) and IL-13 (B) were measured in the basolateral compartment. The data shown are represented as mean ± SEM of *n* = 4 independent PBMC donors for IL-13 and *n* = 6 for TNFα. Additionally, IL-13 and TNFα secretion was correlated using Pearson correlation to IEC-derived galectins as shown in table (C) (\* *p* < 0.05, \*\* *p* < 0.01, \*\*\* *p* < 0.001). Negative correlations are represented as (-) and (n.s.) represents non-significant correlations.

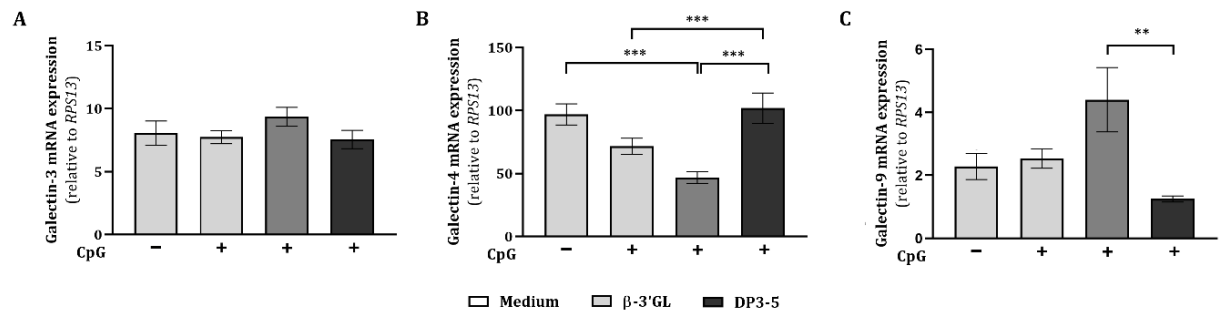

**Figure S3. Galectin mRNA expression.** After IEC/PBMC co-culture, IEC were separated from the PBMC fraction, washed and cultured in fresh medium for 24 hours after which IEC were collected and the relative mRNA expression of galectin-3 (A), -4 (B) and -9 (C) was measured. Data represent mean  $\pm$  SEM of  $n = 6$  independent PBMC donors (\*\*  $p < 0.01$ , \*\*\*  $p < 0.001$ ).
